# Supplementary material for: Development of voriconazole loaded large porous particles for inhalation delivery: effect of surface forces on aerosolisation performance, assessment of in vitro safety potential and uptake by macrophages
Source: Royal Society of Chemistry journal article supplement (doi:10.1039/c5ra00248f), 2015-01-01

### Supplementary Information

#### Pareto Chart Analysis for AD

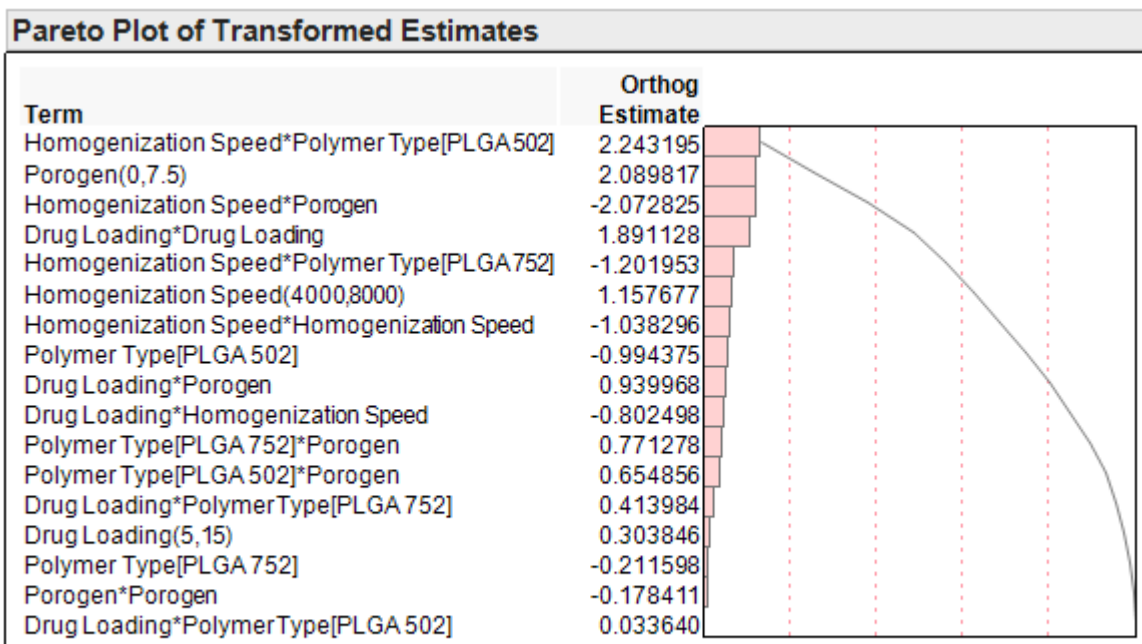

#### Pareto Chart Analysis for FPF

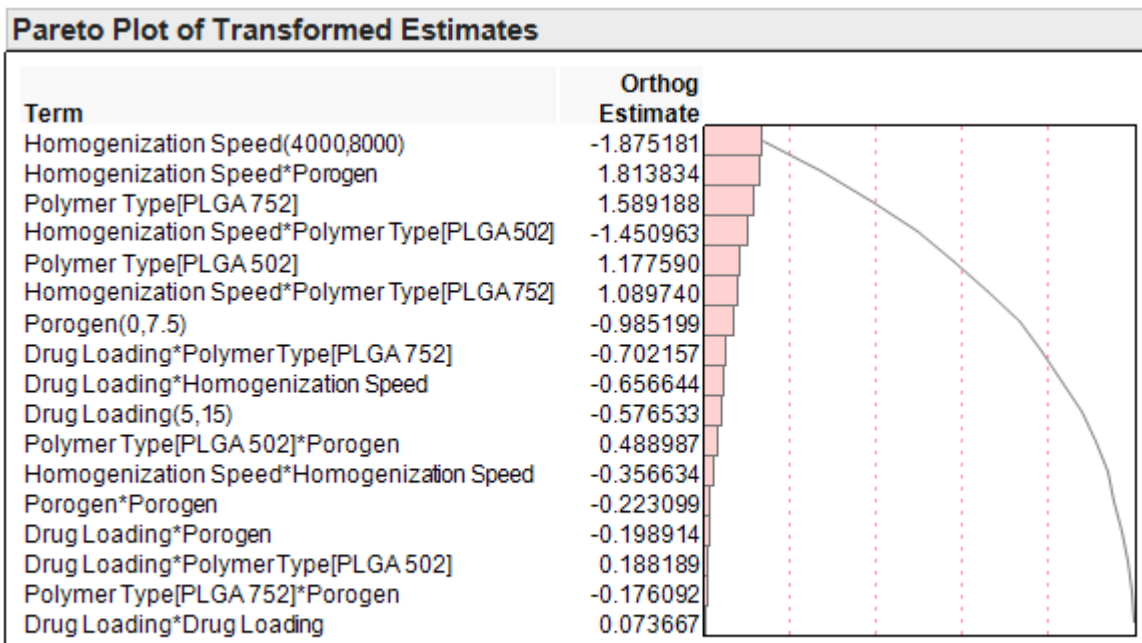

## Supplementary Information

### Pareto Chart Analysis for Surface Energy

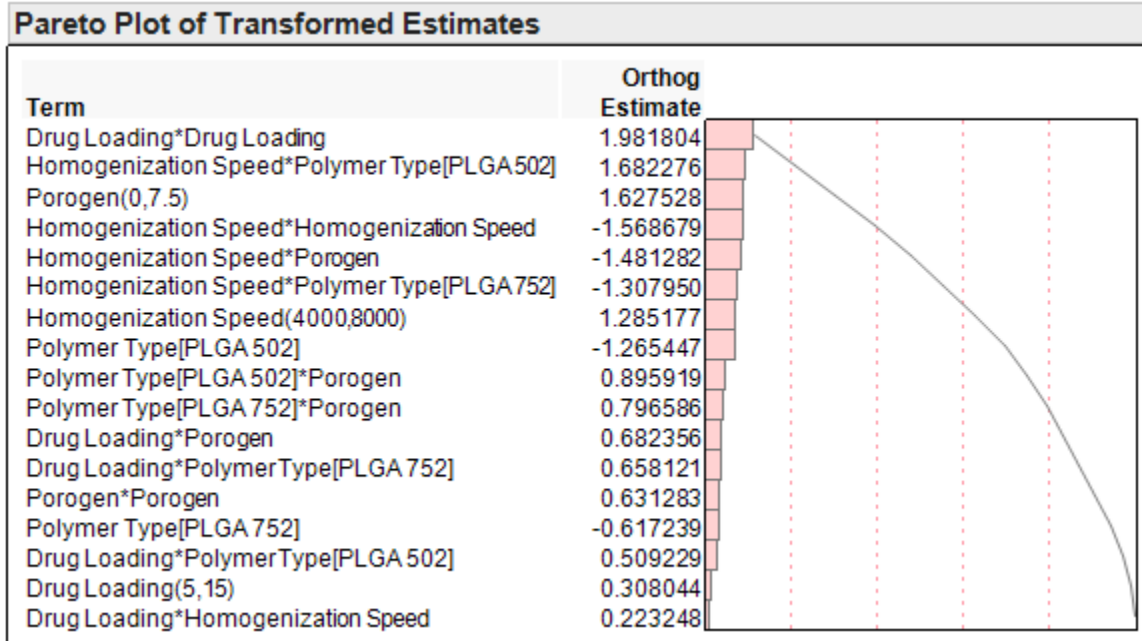

### Pareto Chart Analysis for GSD

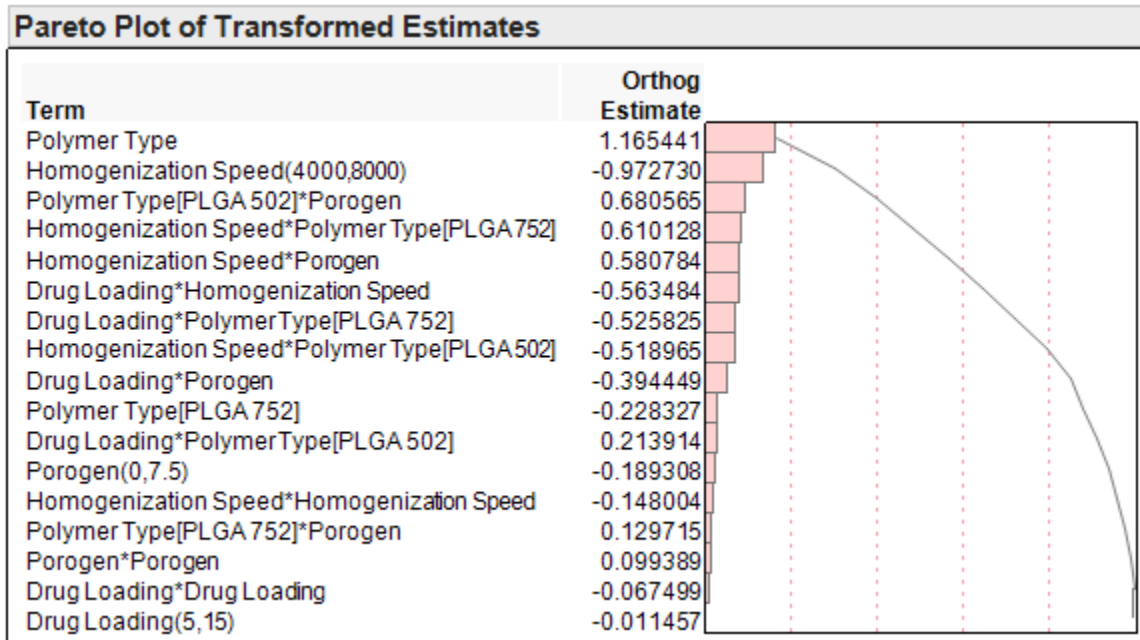

**Supplementary Information**

Pareto Chart Analysis for Span

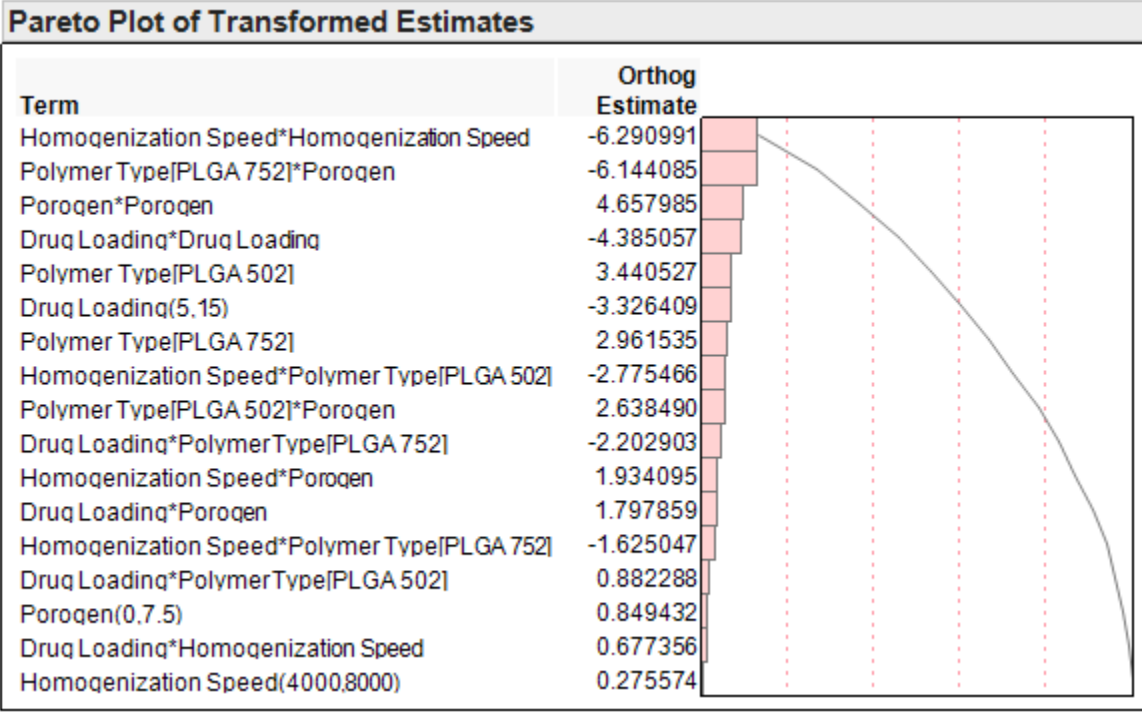

Pareto Chart Analysis for tMMAD

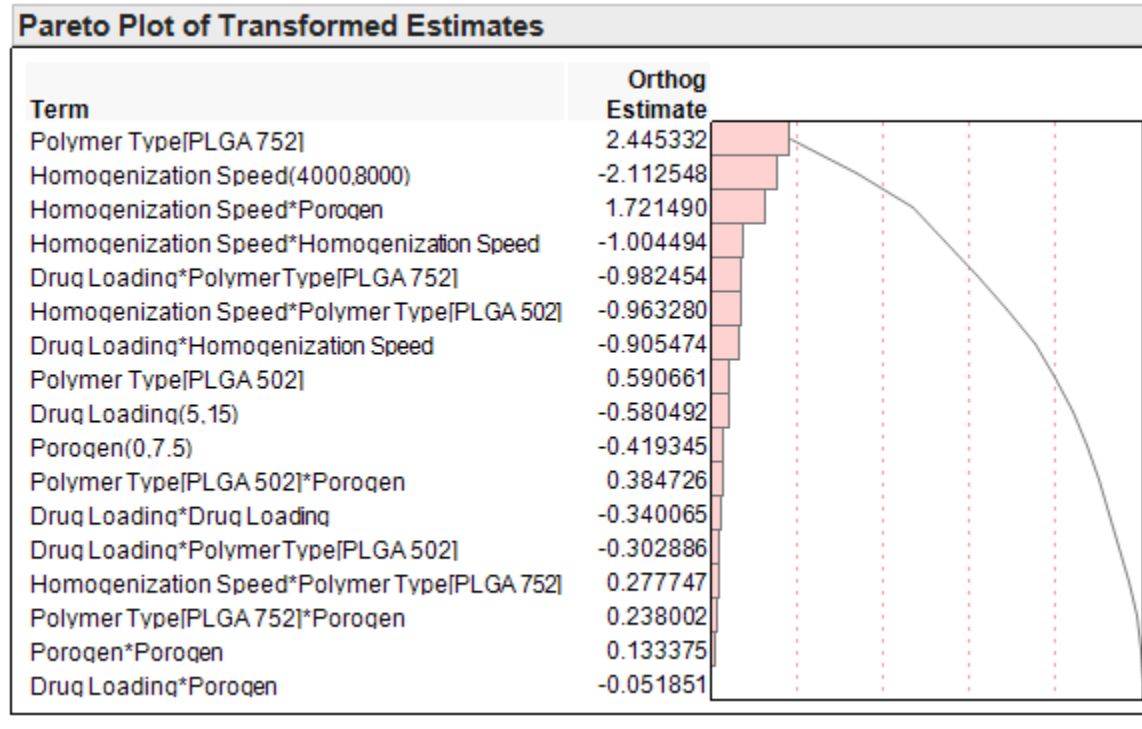

**Supplementary Information**

Pareto Chart Analysis for Practical Loading

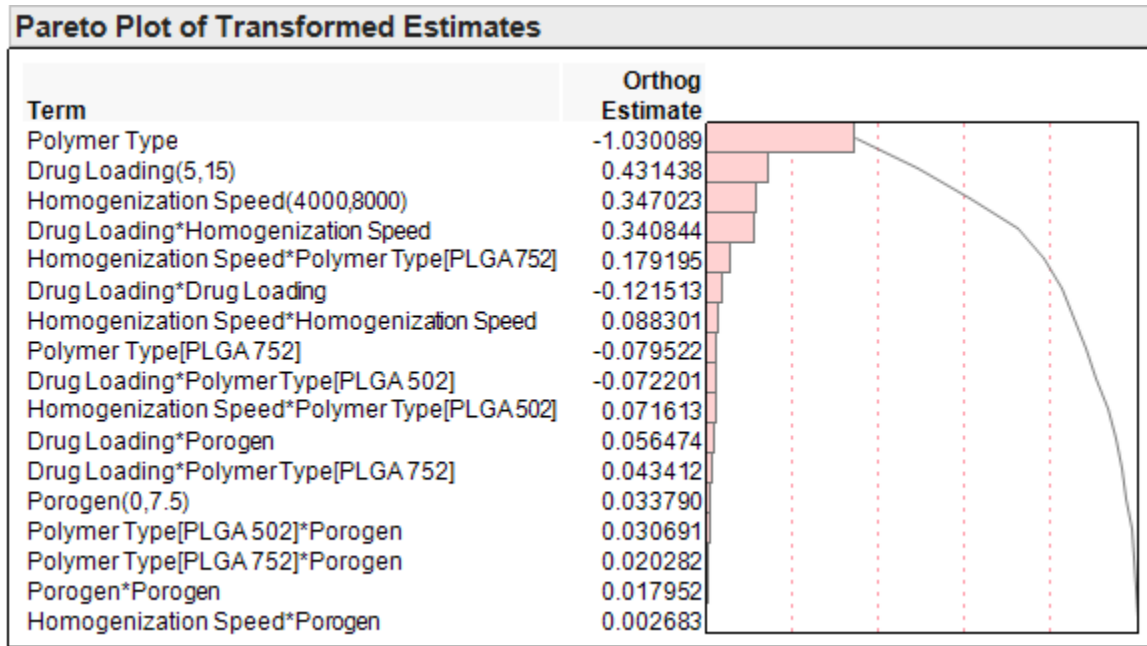

Pareto Chart Analysis for Geometric diameter

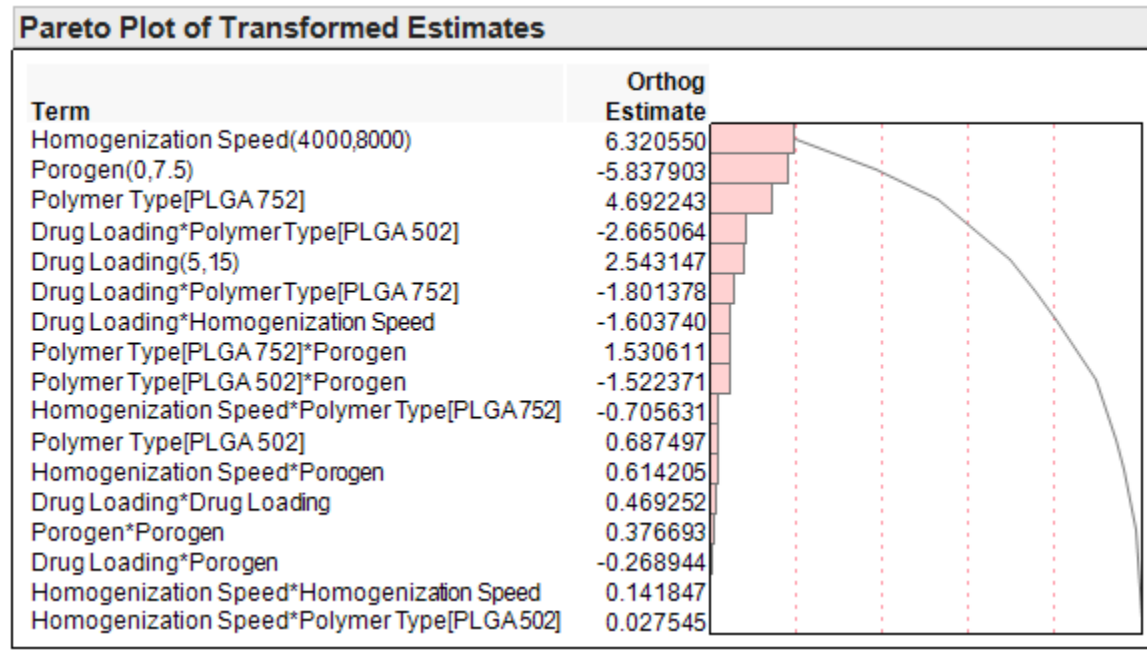

Pareto Chart Analysis for Entrapment Efficiency

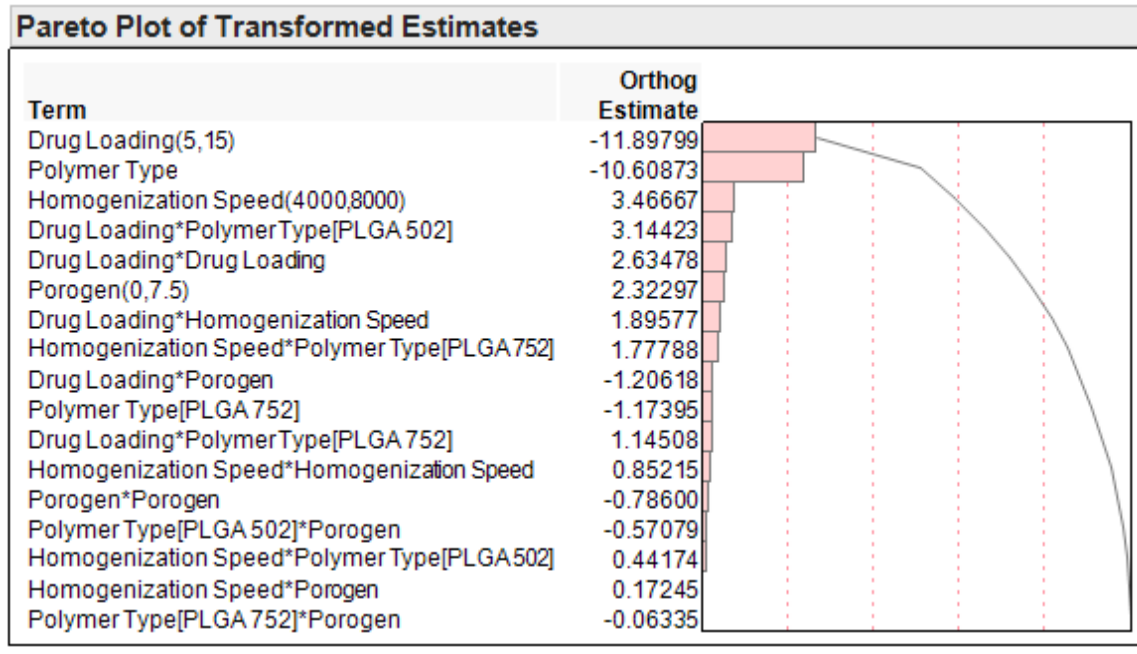

Pareto Chart Analysis for Poured Density

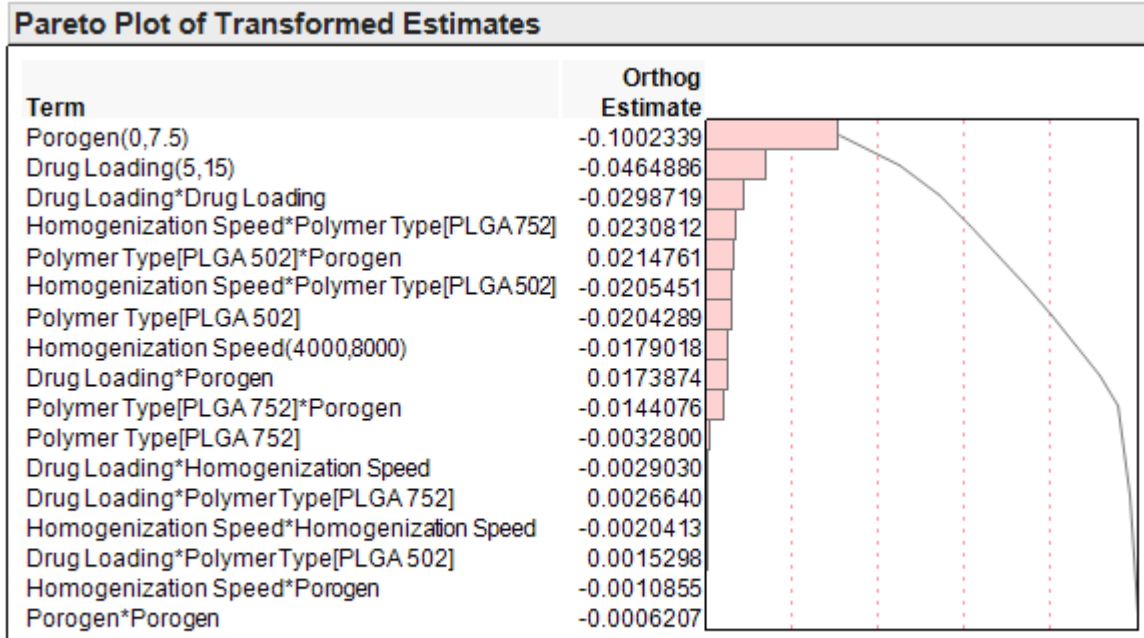

Pareto Chart Analysis for Tapped Density

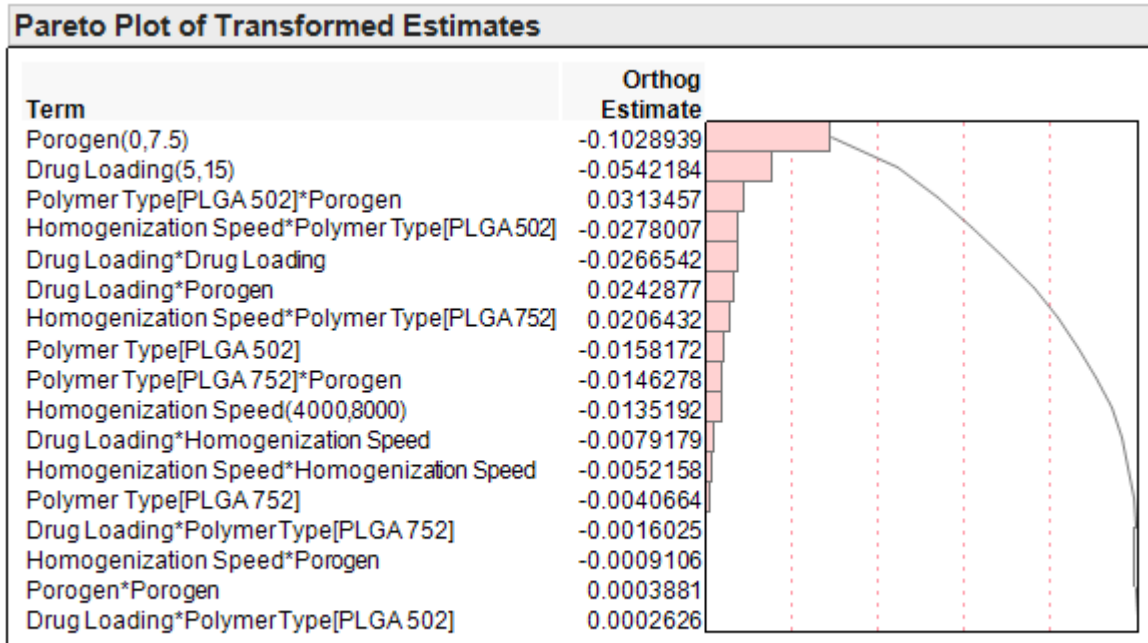

Pareto Chart Analysis for Porosity

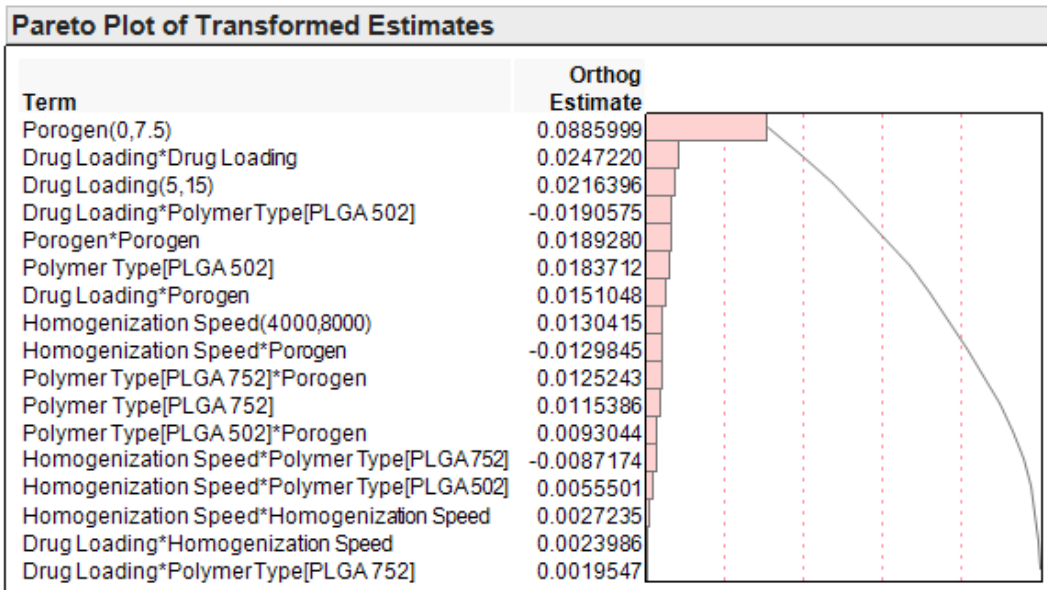

**Supplementary Information**

Surface profiler explaining the relationship between factors and responses measurements of VLPP fabricated from PLA. This has been mentioned as supplementary information since design space was only identified in the case of VLPP fabricated from PLA.

A) Surface profiler between porogen and homogenization speed and its relation with various response parameters measured

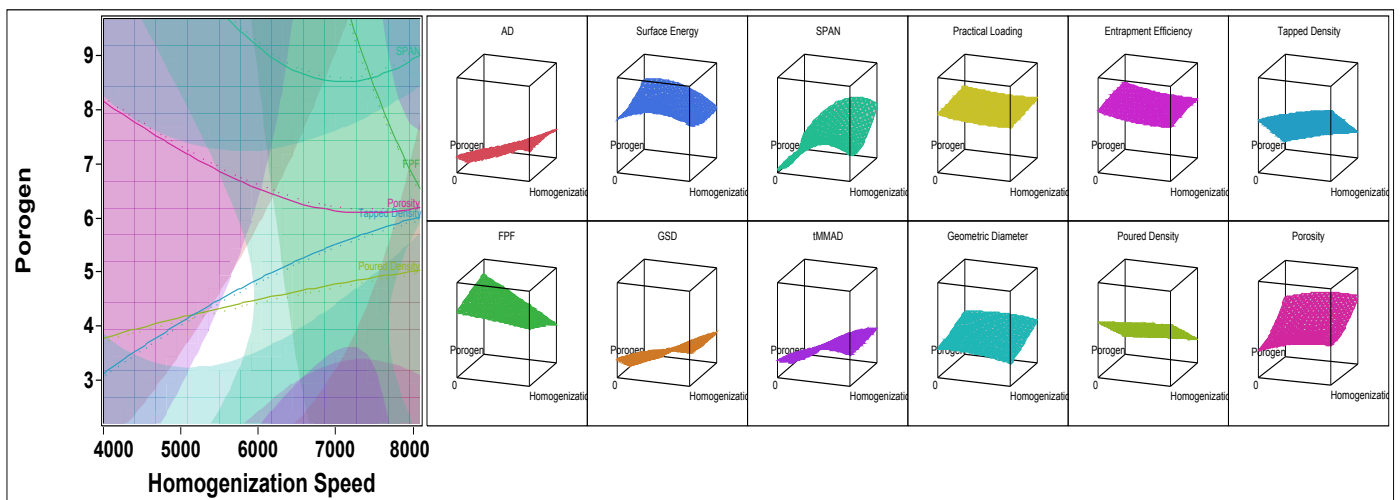

B) Surface profiler between porogen and drug loading and its relation with various response parameters measured

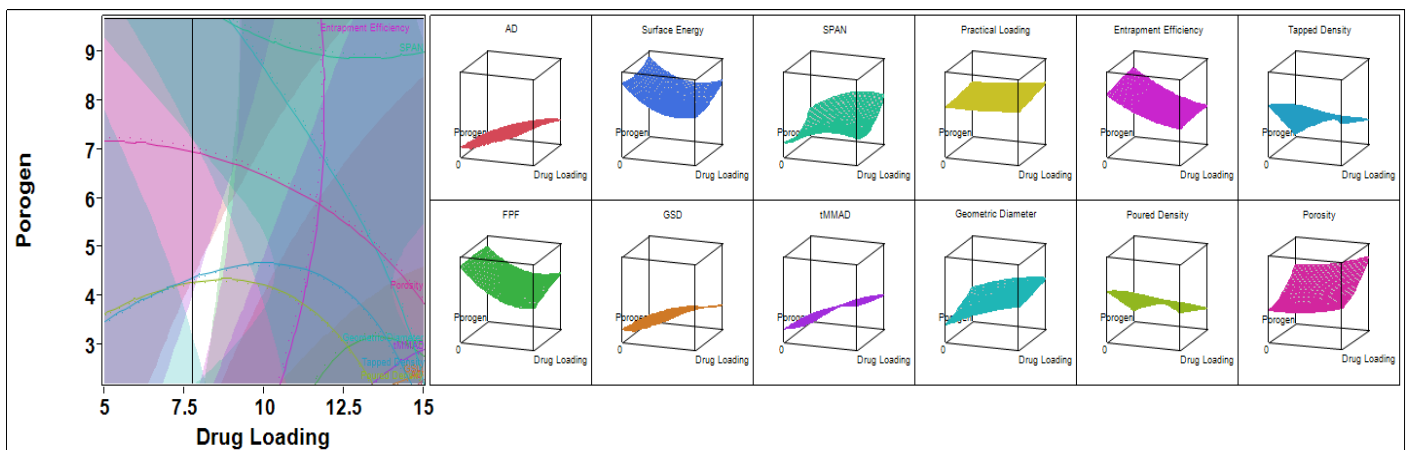

C) Surface profiler between homogenization speed and drug loading and its relation with various response parameters measured

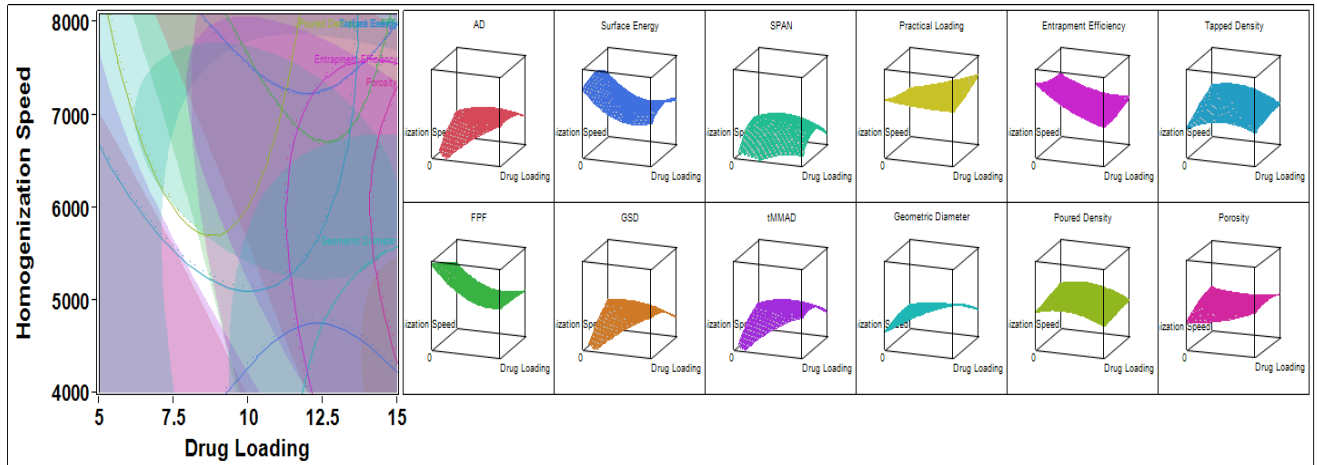

Supplement: c5ra00248f1.pdf [file c5ra00248f1.pdf]
